# Supplementary material
Source: Springer Nature journal article supplement (https://www.springermedizin.de/resource/supplementary/12998_2011_58_MOESM20_ESM.pdf/9680054)

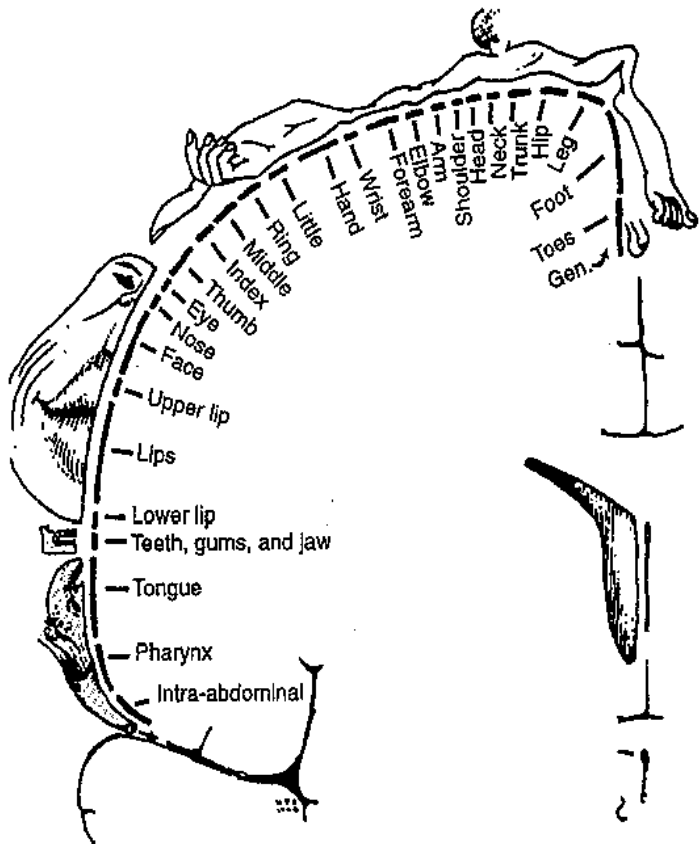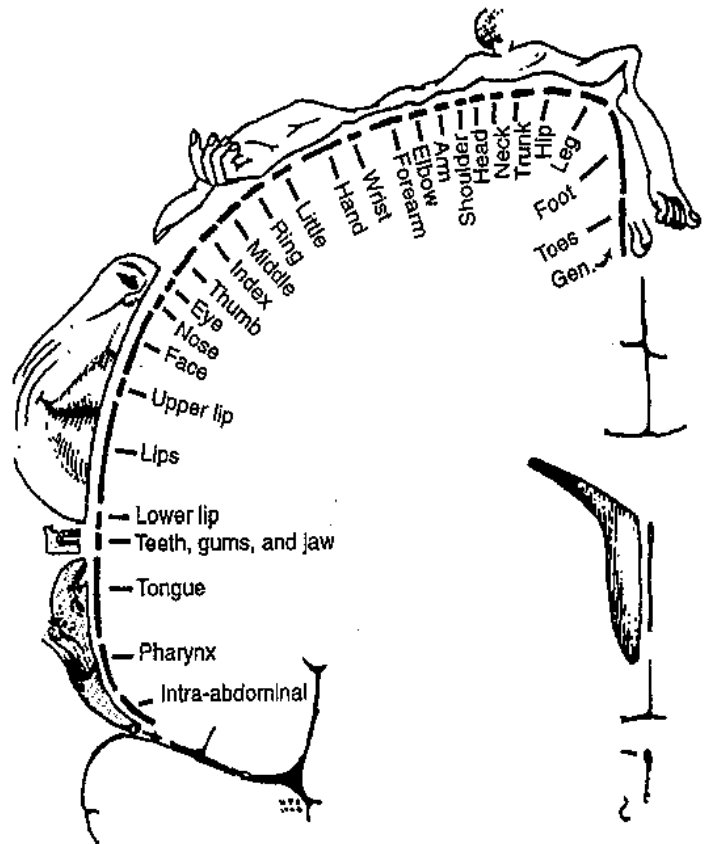

Somatosensory homunculus showing location of spine and torso. ■

Supplement: MOESM20 [file 9680054]
